# Supplementary material
Source: publisher figshare collection journal article supplement (https://acs.figshare.com/ndownloader/files/4380658)
Supplement: Supplementary file 1 [file 4380658]

## **Supporting Information**

### **Time-Dependent Enzyme Activity Dominated by Dissociation of J-Aggregates Bound to Protein Surface**

Kenji Watanabe and Koji Kano\*

*Department of Molecular Chemistry and Biochemistry, Doshisha*

*University, Kyotanabe, Kyoto, 610-0321, Japan*

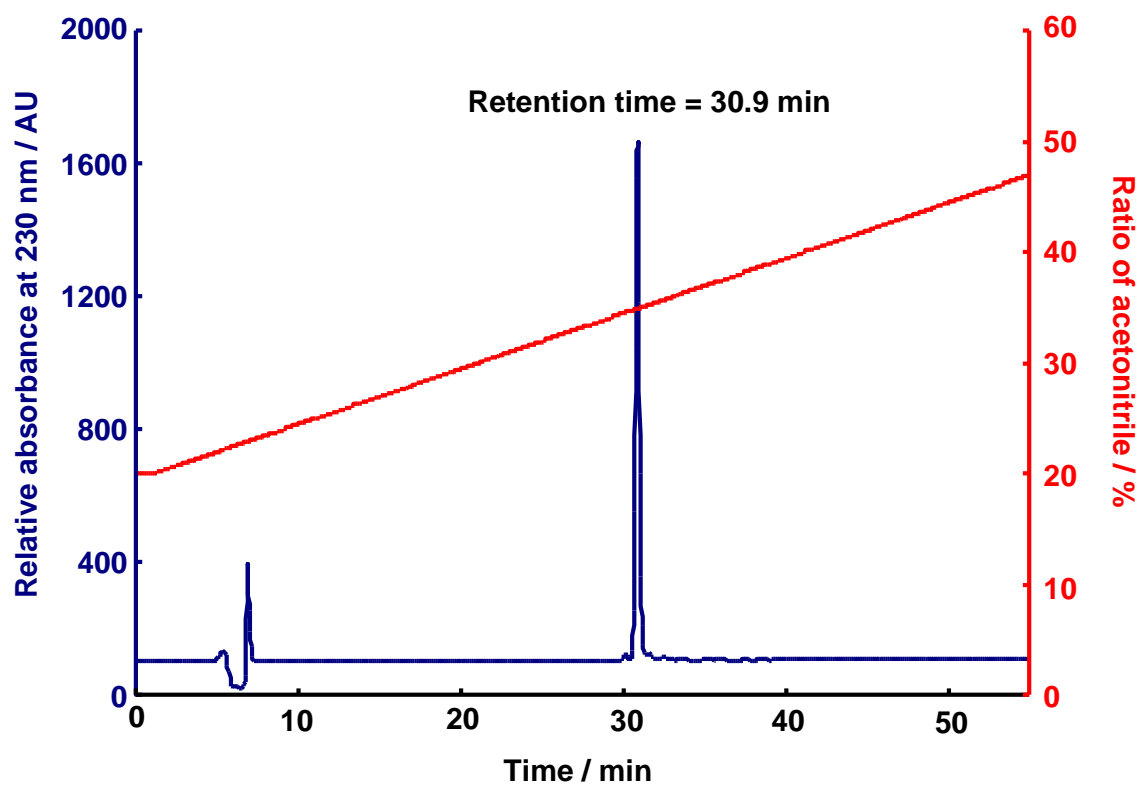

**Figure S1.** FPLC profile of SPNA3G3E recorded at 230 nm. Red solid line represents the ratio of acetonitrile in the eluent (acetonitrile/water containing 0.1 v/v% TFA). A COSMOSIL 5C18-AR-II (4.6 mm x 250 mm) column (Nacalai Tesque, Kyoto Japan) was used for the analysis. Flow rate of the eluent was 0.5 mL/min.

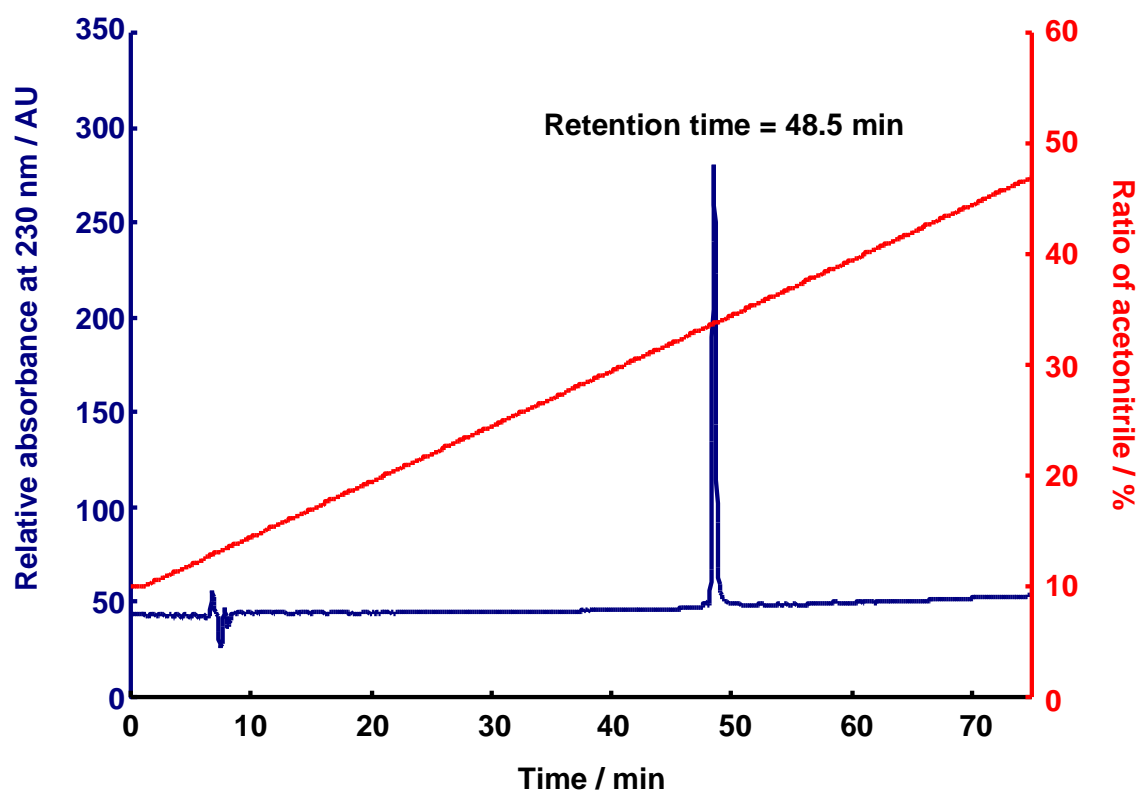

**Figure S2.** FPLC profile of SPNA3G3S recorded at 230 nm. Red solid line represents the ratio of acetonitrile in the eluent (acetonitrile/water containing 0.1 v/v% TFA). A COSMOSIL 5C18-AR-II (4.6 mm x 250 mm) column (Nacalai Tesque, Kyoto Japan) was used for the analysis. Flow rate of the eluent was 0.5 mL/min.

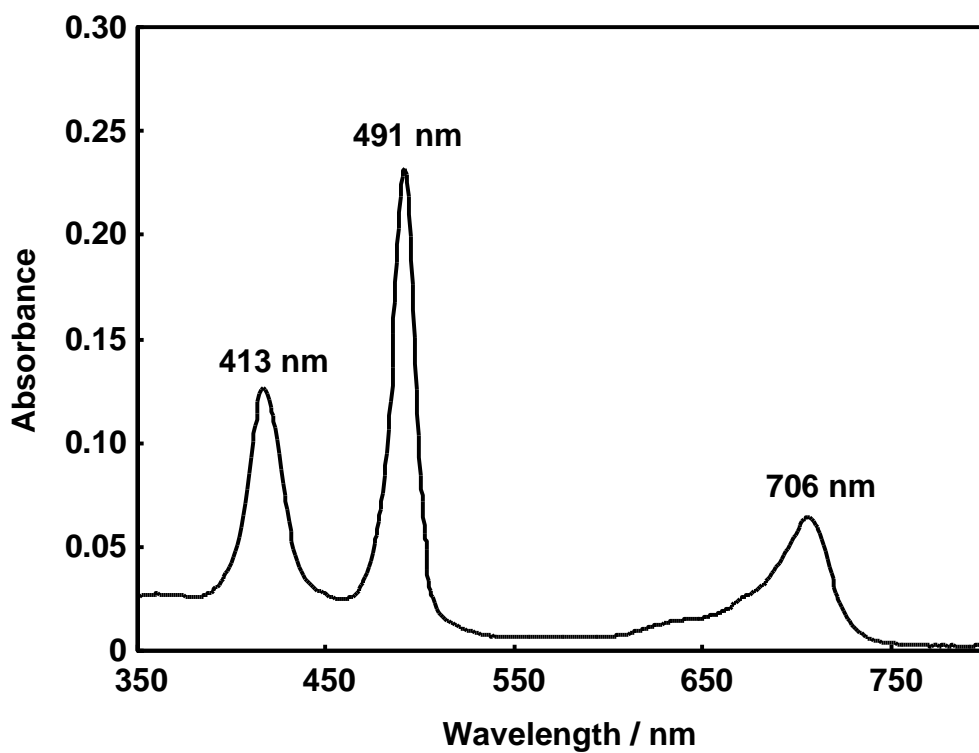

**Figure S3.** UV-visible spectrum of a sample prepared by injecting a stock solution of J-aggregates of  $\text{H}_4\text{TPPS}^{2-}$  ( $2.0\ \mu\text{L}$ ,  $2.0 \times 10^{-3}\ \text{M}$ ) into  $4\ \text{mL}$  of phosphate buffer ( $\text{pH}\ 7.0$ ,  $1.0 \times 10^{-2}\ \text{M}$ ) containing ChT ( $1.0 \times 10^{-4}\ \text{M}$ ) at  $25\ ^\circ\text{C}$ . The total concentration of the porphyrin in the system was  $1.0 \times 10^{-6}\ \text{M}$ .

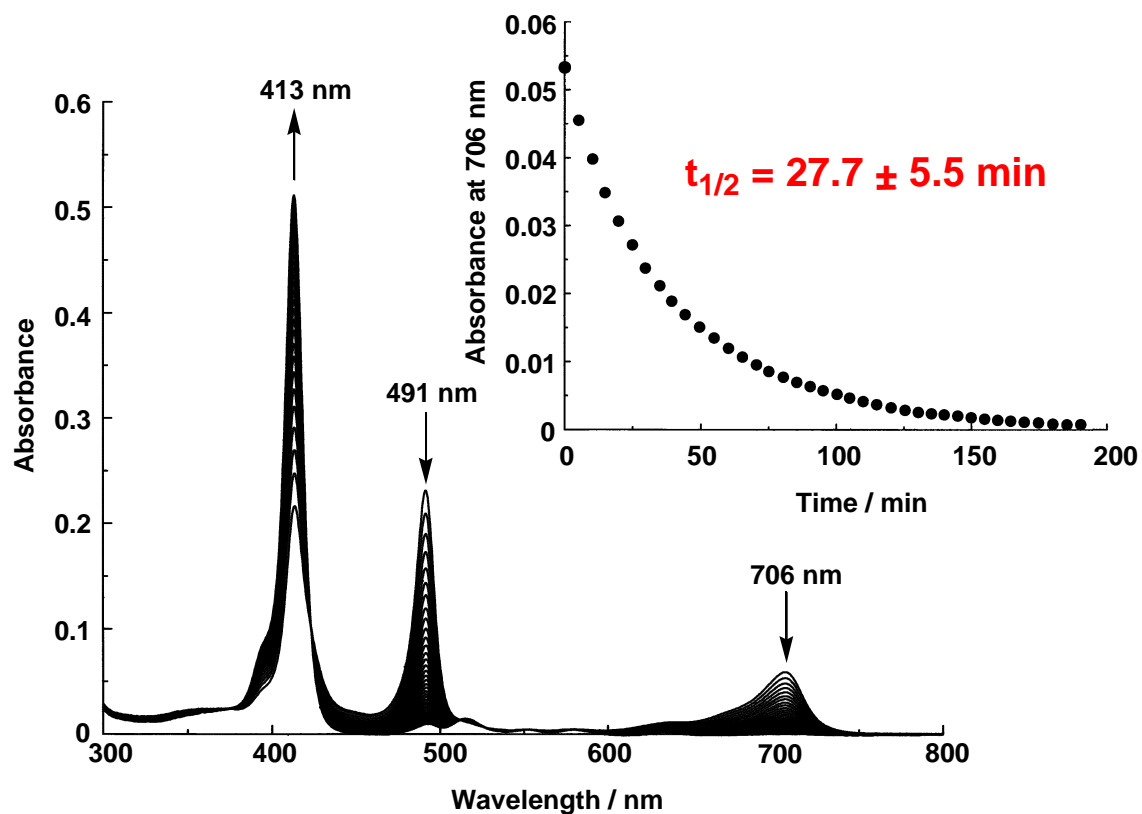

**Figure S4.** Progressive absorption spectral change for decomposition of J-aggregates of  $\text{H}_4\text{TPPS}^{2-}$  bound to ChT ( $1.0 \times 10^{-6} \text{ M}$ ) into the monomers of  $\text{H}_2\text{TPPS}^{4-}$  in phosphate buffer (pH 7.0,  $1.0 \times 10^{-2} \text{ M}$ ) at  $25^\circ\text{C}$ . Inset: Time-course of the absorbance of the J-aggregates at 706 nm. The total concentration of the porphyrin in the system was  $1.0 \times 10^{-6} \text{ M}$ .

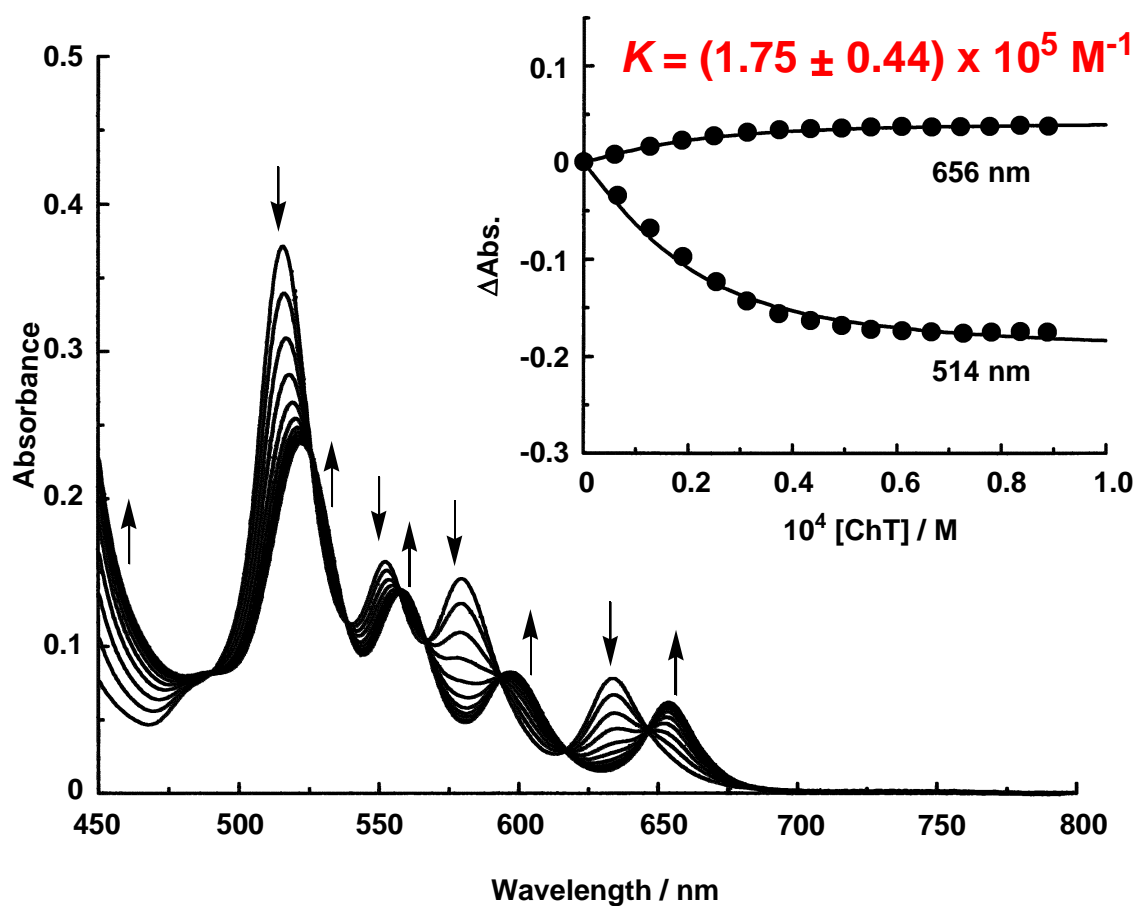

**Figure S5.** UV-visible spectral change of  $\text{H}_2\text{TPPS}^{4-}$  ( $2.0 \times 10^{-5}$  M) upon addition of ChT in phosphate buffer (pH 7.0,  $1.0 \times 10^{-2}$  M) at 25  $^{\circ}\text{C}$ . Inset: Plots of absorbance changes as a function of [ChT] at 514 nm and 656 nm. The solid lines represent the best fits of the data to an equation for 1:1 complexation for determining  $K$  value.

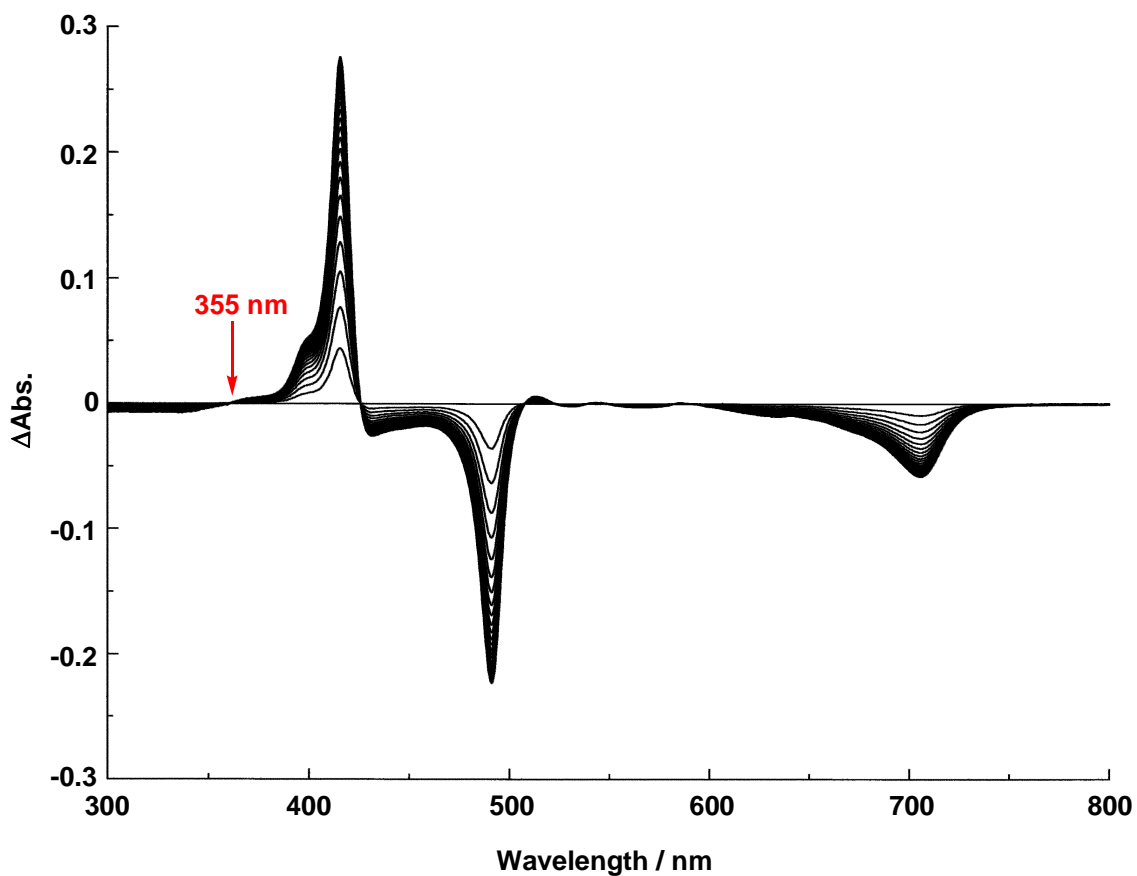

**Figure S6.** Differential spectral change for decomposition of J-aggregates of  $\text{H}_4\text{TPPS}^{2-}$  bound to ChT ( $1.0 \times 10^{-6}$  M) into the  $\text{H}_2\text{TPPS}^{4-}$ /TMe- $\beta$ -CD inclusion complex in phosphate buffer (pH 7.0 and  $1.0 \times 10^{-2}$  M) containing TMe- $\beta$ -CD ( $8.0 \times 10^{-6}$  M) at 25 °C. The total concentration of the porphyrin in the system was  $1.0 \times 10^{-6}$  M.

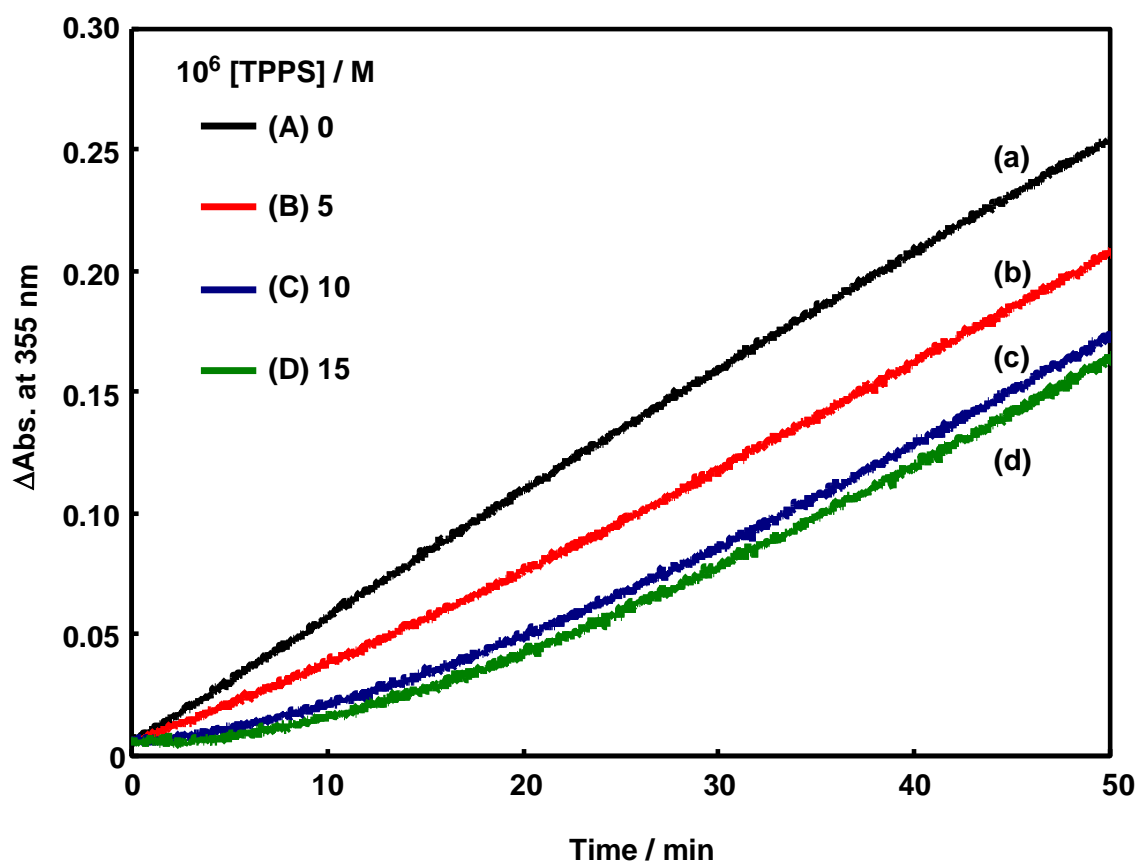

**Figure S7.** Effects of the amount of J-aggregates on hydrolysis of SPNA3G3E ( $3.0 \times 10^{-4}$  M) catalyzed by ChT ( $1.0 \times 10^{-6}$  M) in phosphate buffer (pH 7.0,  $1.0 \times 10^{-2}$  M) containing TMe- $\beta$ -CD ( $1.2 \times 10^{-4}$  M) at 25 °C. [TPPS] = 0 M (A);  $5.0 \times 10^{-6}$  M (B);  $1.0 \times 10^{-5}$  M (C);  $1.5 \times 10^{-5}$  M (D).
